# Supplementary material for: Identification of radiation responsive genes and transcriptome profiling via complete RNA sequencing in a stable radioresistant U87 glioblastoma model
Source: PubMed Central journal article supplement (PMC5955095; doi:10.18632/oncotarget.25247), 2018-05-04
Supplement: oncotarget-09-23532-s001.pdf [file oncotarget-09-23532-s001.pdf]

# Identification of radiation responsive genes and transcriptome profiling via complete RNA sequencing in a stable radioresistant U87 glioblastoma model

## SUPPLEMENTARY MATERIALS

**Supplementary Table 1: Raw data of all differentially expressed genes are shown.**  $P < 0.05$  and experiments were performed in triplicates. See Supplementary\_Table\_1

**Supplementary Table 2: Upregulated genes with 2-fold or higher changes are shown.**  $P < 0.05$  and experiments were performed in triplicates. See Supplementary\_Table\_2

**Supplementary Table 3: Downregulated genes with 2-fold or higher changes are shown.**  $P < 0.05$  and experiments were performed in triplicates. See Supplementary\_Table\_3

**Supplementary Table 4: Complete sets of upregulated genes of selected enriched gene ontology categories following irradiation are shown based on sets of statistically significant changes ( $P < 0.05$ ).** Experiments were performed in triplicates. See Supplementary\_Table\_4

**Supplementary Table 5: Complete sets of downregulated genes of selected enriched gene ontology categories following irradiation are shown based on sets of statistically significant changes ( $P < 0.05$ ).** Experiments were performed in triplicates. See Supplementary\_Table\_5
